# Supplementary material
Source: Springer Nature journal article supplement (https://www.springermedizin.de/resource/supplementary/12936_2013_3152_MOESM6_ESM.pdf/9546286)
Supplement: MOESM6 [file 9546286]

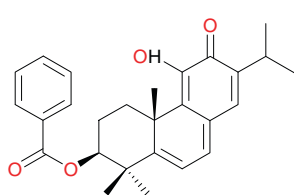

3-O-benzoylhosloppone (51)

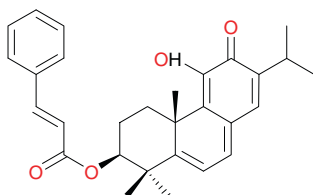

3-O-cinnamoylhosloppone (52)

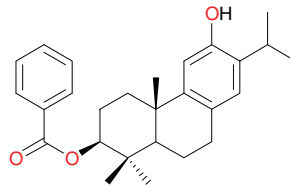

3-O-benzoylhinokiol (53)

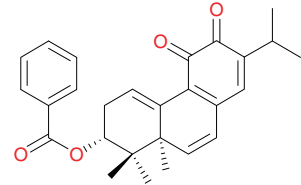

3-O-benzoylhosloquinone (54)

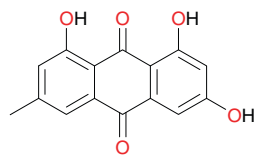

Emodin (55)

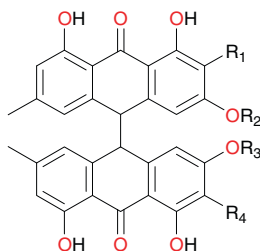

Glaberianthrone (56): R<sub>1</sub> = Geranyl, R<sub>2</sub> = H,  
R<sub>3</sub> = Prenyl, R<sub>4</sub> = H  
Bianthrone 1a (60): R<sub>1</sub> = Geranyl, R<sub>2</sub> = H,  
R<sub>3</sub> = H, R<sub>4</sub> = Geranyl

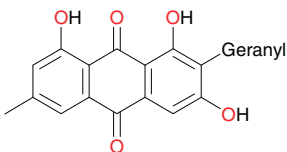

2-Geranylemodin (59)

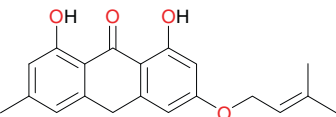

3-Prenyloxyemodin anthrone (61)

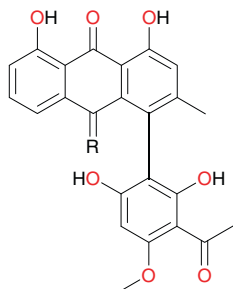

Knipholone (68): R = O

Anthrone (69): R = H<sub>2</sub>

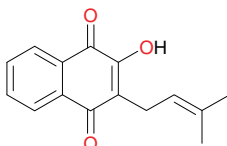

Lapachol (67)

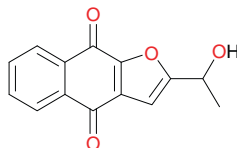

2-(1-Hydroxyethyl)naphtho[2,3-*b*]furan-4,9-dione (70)

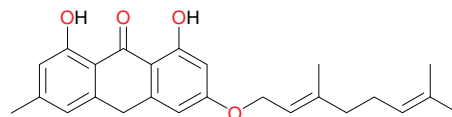

3-Geranyloxyemodin anthrone (57)

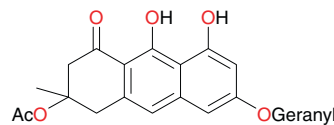

Acetylvismione D (58)

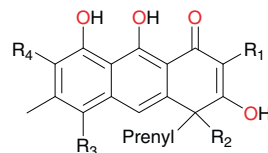

Bazouanthrone (62): R<sub>1</sub> = Prenyl, R<sub>2</sub> = Prenyl, R<sub>3</sub> = OH, R<sub>4</sub> = H  
Feruginin A (63): R<sub>1</sub> = H, R<sub>2</sub> = Prenyl, R<sub>3</sub> = H, R<sub>4</sub> = Prenyl  
Harunganin (64): R<sub>1</sub> = H, R<sub>2</sub> = Prenyl, R<sub>3</sub> = Prenyl, R<sub>4</sub> = H  
Harunganol A (65): R<sub>1</sub> = H, R<sub>2</sub> = H, R<sub>3</sub> = Prenyl, R<sub>4</sub> = Prenyl  
Harunganol B (66): R<sub>1</sub> = H, R<sub>2</sub> = H, R<sub>3</sub> = Prenyl, R<sub>4</sub> = H

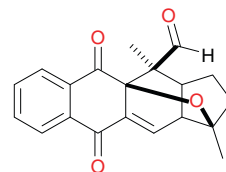

Isopinnatal (71)
